# $\alpha$ v $\beta$ 8 integrin adhesion and signaling pathways in development, physiology and disease

Joseph H. McCarty

## ABSTRACT

Cells must interpret a complex milieu of extracellular cues to modulate intracellular signaling events linked to proliferation, differentiation, migration and other cellular processes. Integrins are heterodimeric transmembrane proteins that link the extracellular matrix (ECM) to the cytoskeleton and control intracellular signaling events. A great deal is known about the structural and functional properties for most integrins; however, the adhesion and signaling pathways controlled by  $\alpha$ v $\beta$ 8 integrin, which was discovered nearly 30 years ago, have only recently been characterized.  $\alpha$ v $\beta$ 8 integrin is a receptor for ECM-bound forms of latent transforming growth factor  $\beta$  (TGF $\beta$ ) proteins and promotes the activation of TGF $\beta$  signaling pathways. Studies of the brain, lung and immune system reveal that the  $\alpha$ v $\beta$ 8 integrin–TGF $\beta$  axis mediates cell–cell contact and communication within complex multicellular structures. Perturbing components of this axis results in aberrant cell–cell adhesion and signaling leading to the initiation of various pathologies, including neurodegeneration, fibrosis and cancer. As discussed in this Review, understanding the functions for  $\alpha$ v $\beta$ 8 integrin, its ECM ligands and intracellular effector proteins is not only an important topic in cell biology, but may lead to new therapeutic strategies to treat human pathologies related to integrin dysfunction.

**KEY WORDS:** Extracellular matrix, Cancer, Angiogenesis, Microenvironment, Pathophysiology

## Introduction

Cells must interpret a complex milieu of extracellular matrix (ECM) cues to modulate intracellular signaling events linked to proliferation, differentiation and migration. Precise control of these events promotes normal tissue development and physiology, and these events are often deregulated in diseases ranging from neurodegeneration to autoimmunity and cancer. Cells interact with each other as well as with ECM cues in the microenvironment via various adhesion receptors. The major receptors used by metazoan cells to interact with the ECM are integrins, which are heterodimeric transmembrane proteins formed from an  $\alpha$  and  $\beta$  subunit that can engage with the ECM and modulate intracellular signaling functions (Hynes, 2002). In vertebrates, there are 24 integrin-encoding genes; 16 genes encoding integrin  $\alpha$  subunits and eight genes encoding integrin  $\beta$  subunits. These integrin subunits can dimerize in various combinations to yield at least 24 distinct functional heterodimers that often display cell type-specific expression patterns and regulate distinct adhesion and signaling pathways.

In this Review, I will summarize adhesion and signaling functions for a specific integrin,  $\alpha$ v $\beta$ 8, in development, physiology and disease.  $\alpha$ v $\beta$ 8 integrin is a member of the  $\alpha$ v subfamily of integrins, which

comprises  $\alpha$ v $\beta$ 1,  $\alpha$ v $\beta$ 3,  $\alpha$ v $\beta$ 5 and  $\alpha$ v $\beta$ 6 (Weis and Cheresh, 2011). These integrins bind with high specificity to RGD peptide, a motif that is present in many ECM proteins, including vitronectin and collagen IV, as well as latent TGF $\beta$ 1 and latent TGF $\beta$ 3 (Hynes et al., 2002). The cDNA sequence encoding  $\beta$ 8 integrin (*Itgb8*) was first isolated from mammalian tissues and reported in 1991 (Moyle et al., 1991). Biochemical and cell-based experiments showed that  $\beta$ 8 integrin dimerizes exclusively with the  $\alpha$ v integrin (Nishimura et al., 1994). Based on primary amino acid sequence,  $\beta$ 8 integrin is predicted to be 81 kDa in size; however, modifications at one or more of seven possible N-glycosylation sites in the extracellular domain results in an apparent molecular mass of 100 kDa on SDS polyacrylamide gels. *Itgb8* gene expression patterns were initially found to be quite restrictive, with mRNA detected mainly in the brain and kidney (Moyle et al., 1991).  $\beta$ 8 protein expression analysis, however, shows detectable levels in most organs, with the exception of adipose tissue and blood (<https://www.proteinatlas.org/ENSG00000105855-ITGB8/tissue>). The mouse *Itgb8* gene has been mapped to chromosome 12, whereas human *ITGB8* is located on chromosome 7.

The objective of this Review is to summarize the current knowledge about  $\alpha$ v $\beta$ 8 integrin and its essential roles in development and pathophysiology. A particular emphasis will be placed on  $\alpha$ v $\beta$ 8 integrin-mediated activation of TGF $\beta$  signaling pathways during central nervous system (CNS) development. Intracellular proteins that bind to the  $\beta$ 8 integrin cytoplasmic tail and activate signaling events will also be discussed. In addition, I will also summarize three-dimensional structural studies of  $\alpha$ v $\beta$ 8 integrin that reveal unexpected mechanisms of inside-out activation and ECM engagement, and highlight abnormal functions for  $\alpha$ v $\beta$ 8 integrin in diseases that range from immune disorders to cancer. Finally, future experimental priorities as well as potential strategies for therapeutically targeting components of the  $\alpha$ v $\beta$ 8 integrin–TGF $\beta$  adhesion and signaling axis to treat human diseases are highlighted.

## Integrin $\alpha$ v $\beta$ 8 activation of latent TGF $\beta$ ECM protein ligands

Early studies with cultured neuronal cells and *in vitro* ECM adhesion assays showed that  $\alpha$ v $\beta$ 8 integrin can bind to vitronectin, fibronectin and various other ECM ligands containing common RGD sequences (Ozawa et al., 2016; Venstrom and Reichardt, 1995). However, various *in vitro* biochemical reports and genetic studies have revealed that *in vivo* the major ECM ligands for  $\alpha$ v $\beta$ 8 integrin are latent TGF $\beta$  proteins (Worthington et al., 2011). The three mammalian TGF $\beta$ -encoding genes (*TGFB1*, *TGFB2* and *TGFB3*) give rise to proteins that are deposited into the ECM as inactive latent complexes, with the bioactive cytokine non-covalently linked to latency-associated peptide (LAP). During TGF $\beta$  activation, structural rearrangement of the latent TGF $\beta$  complex leads to cytokine engagement with TGF $\beta$  receptor and activation of intracellular signaling events including those mediated by Smad transcription factors (Shi et al., 2011). Although there are

Department of Neurosurgery, Brain Tumor Center, M.D. Anderson Cancer Center, 6767 Bertner Avenue, Unit 1004, Houston, TX 77030, USA.

Author for correspondence (jhmccarty@mdanderson.org)

 J.H.M., 0000-0002-8345-5478

several possible factors, including reactive oxygen species, that promote the activation of latent TGF $\beta$  (Barcellos-Hoff et al., 1994), integrin-dependent adhesion is a major regulatory mechanism. Knock-in strategies have been used to mutate the RGD sites within latent TGF $\beta$ 1 to RGE, which abrogates integrin binding (Yang et al., 2007). These RGE mutant mice develop vascular phenotypes identical to those that develop in TGF $\beta$ 1-null mice, highlighting the *in vivo* significance of integrin-dependent TGF $\beta$  activation. Biochemical studies have also shown that  $\alpha$ v $\beta$ 8 integrin can bind directly to the RGD sequence within the inhibitory LAP domain of latent TGF $\beta$ 1 and latent TGF $\beta$ 3 (Cambier et al., 2005).

In most integrin heterodimers, the cytoplasmic domain of the  $\beta$ -integrin subunit is involved in a molecular ‘handshake’ with the cytoplasmic tail of the adjacent  $\alpha$ -integrin. These intracellular interactions maintain the extracellular region in an inactive state that is not engaged with ECM ligands (Ginsberg, 2014). This  $\alpha$ - $\beta$  juxtamembrane interaction is disrupted by the recruitment of FERM-domain-containing proteins, including talins and kindlins, to the cytoplasmic tail of the  $\beta$ -integrin subunit (Calderwood et al., 1999; Harburger et al., 2009; Zhang et al., 2008). However, the  $\beta$ 8 integrin cytoplasmic tail is divergent from other integrins and does not contain NPXY motifs that interact with FERM-domain-containing proteins, suggesting that there must be distinct mechanisms that regulate  $\alpha$ v $\beta$ 8 integrin affinity for ECM ligands. Protein structure data reveal that the extracellular region of  $\alpha$ v $\beta$ 8 integrin is found mainly in an ‘extended-closed’ and, thus, partially active conformation, rather than the mixture of bent (inactive) and extended (active) conformations that is common in other integrins (Wang et al., 2017). In addition, the affinity of  $\alpha$ v $\beta$ 8 integrin for latent TGF $\beta$ 1 is activated only 2- to 3-fold by Mn $^{2+}$ , whereas Mn $^{2+}$  activates other integrins and enhances their interactions with ECM ligands by up to 50-fold (Wang et al., 2017). The  $\alpha$ v $\beta$ 8 integrin headpiece is not stabilized in an open conformation by Mn $^{2+}$  but has lower overall affinity for latent TGF $\beta$ 1, as compared to  $\alpha$ v $\beta$ 6 integrin (Wang et al., 2017). Although  $\alpha$ v $\beta$ 8 integrin is detected in an extended-closed structural conformation, subtle changes in the  $\beta$ 8 integrin head regions involving the  $\beta$ I domain lead to enhanced engagement with latent TGF $\beta$ . This structural switch likely depends on interactions with cytoskeletal adaptor proteins, particularly the Band 4.1 proteins (McCarty et al., 2005a). Cryo-electron microscopy (EM) experiments largely support the crystal structure data, indicating that  $\alpha$ v $\beta$ 8 integrin on the cell surface is present mainly in an extended and partially active conformation, which allows for constitutive interactions with ECM ligands (Cormier et al., 2018). Although key contributions by the cytoskeleton are not addressed in the cryo-EM analyses, these results do reveal that association of  $\alpha$ v $\beta$ 8 integrin with latent TGF $\beta$  results in cytokine activation without integrin disengagement from the complex (Campbell et al., 2020). However, it should be noted that X-ray structural analyses of latent TGF $\beta$  reveal a highly dynamic molecule, with some conformations lacking integrin binding potentials (Hinck et al., 2016). Hence, it will be important to analyze complexes of  $\alpha$ v $\beta$ 8 integrin and latent TGF $\beta$  using crystallography methods to confirm the conclusions of the cryo-EM studies.

The various structural and biochemical data detailed above support a model in which  $\alpha$ v $\beta$ 8 integrin is present on the cell surface in a constitutively active conformation that engages with ECM ligands independently of inside-out activation pathways used by most other integrins, including  $\alpha$ v $\beta$ 6. Although  $\alpha$ v $\beta$ 6 integrin can also promote TGF $\beta$  activation (Munger et al., 1999), there are various mechanistic distinctions underlying how  $\alpha$ v $\beta$ 8 and  $\alpha$ v $\beta$ 6 engage with the latent complex and promote TGF $\beta$  activation. First,

$\alpha$ v $\beta$ 6 integrin is present on the cell surface mainly in a bent-closed conformation (Dong et al., 2017). Interactions with cytoskeletal adaptors, such as talins and kindlins, via NPXY motifs in the  $\beta$ 6 cytoplasmic tail promote inside-out  $\alpha$ v $\beta$ 6 integrin activation and enhanced ligand engagement. In contrast,  $\alpha$ v $\beta$ 8 integrin has a divergent cytoplasmic domain (see signaling section below) and as detailed above is present in extended-closed conformation (Wang et al., 2017; Wang et al., 2019). Second, the  $\beta$ 6 integrin cytoplasmic tail is absolutely required for TGF $\beta$  activation, whereas TGF $\beta$  activation can occur in the absence of the  $\beta$ 8 cytoplasmic tail (Mu et al., 2002). Third,  $\alpha$ v $\beta$ 6 binding to latent TGF $\beta$  promotes cytokine activation but involves subsequent disengagement from the latent complex (Dong et al., 2014), which is distinct from the continuous engagement mechanism reported for  $\alpha$ v $\beta$ 8 integrin (Campbell et al., 2020). Finally,  $\alpha$ v $\beta$ 8 and  $\alpha$ v $\beta$ 6 integrins show largely non-overlapping cell expression patterns. Integrin  $\alpha$ v $\beta$ 6 is largely absent in glial cells of the CNS and is not expressed at significant levels in circulating immune cell types that utilize  $\alpha$ v $\beta$ 8 integrin for latent TGF $\beta$  activation. Along these lines, combined deletion of  $\beta$ 6 and  $\beta$ 8 integrins (*Itgb6* $^{-/-}$ ;*Itgb8* $^{-/-}$ ) phenocopy developmental pathologies seen in *Itgb8* $^{-/-}$  mice (Aluwihare et al., 2009).

### $\alpha$ v $\beta$ 8 integrin in CNS development

The brain is the most vascularized organ in the mammalian body with its complex network of blood vessels that interact with neurons and glia in multicellular complexes termed neurovascular units (Paredes et al., 2018). Growth factors, ECM proteins and adhesion receptors regulate communication between cells of the neurovascular unit in a coordinated manner to promote normal development and physiology (Fig. 1) (McCarty, 2009). Depletion of *Itgav*, the gene encoding the  $\alpha$ v integrin subunit, in mice reveals essential roles for  $\alpha$ v-containing integrins in neurovascular development (Bader et al., 1998). Embryos of  $\alpha$ v integrin-null mice, which lack all five  $\alpha$ v-containing heterodimers in all cells, display abnormal cerebral blood vessel morphogenesis and intracerebral hemorrhage (Bader et al., 1998; McCarty et al., 2002). Although the whole-body ablation of *Itgb8* leads to very similar brain angiogenesis defects (Zhu et al., 2002), genetic deletion of any of the other four  $\alpha$ v-associated  $\beta$ -subunits individually or in various combinations does not yield CNS phenotypes (Graus-Porta et al., 2001; Hodiola-Dilke et al., 1999; Huang et al., 2000; Munger et al., 1999). In germinal matrices, which are neurogenic regions of the developing brain, expression of *Itgb8* in perivascular glial cells is activated by G protein-coupled receptor (GPCR) signaling via the Ric8 guanine nucleotide exchange factor (GEF) and the kinase p38 $\alpha$  (also known as MAPK14) (Ma et al., 2017; Santhosh and Huang, 2015; Santhosh et al., 2019). Given that similar neurogenic regions in premature human neonates are prone to vascular insult leading to germinal matrix hemorrhage and/or intraventricular hemorrhage (Ballabh, 2010), it will be intriguing to determine whether expression of  $\alpha$ v $\beta$ 8 integrin or its regulatory components are deregulated and contribute to disease pathogenesis.

In addition to brain vascular phenotypes,  $\alpha$ v and  $\beta$ 8 integrin knockout-mice develop a cleft palate, leading to early neonatal death due to the inability to feed (Bader et al., 1998). To study integrin functions selectively in the CNS, Cre-lox strategies were used to selectively ablate the  $\alpha$ v gene (*Itgav*) in mice neural progenitor cells (McCarty et al., 2005b). Conditional knockout animals develop CNS-specific vascular phenotypes; however, they do not develop a cleft palate and many survive for several post-natal months. Interestingly, all CNS-specific  $\alpha$ v conditional mutants display progressive neurological phenotypes, including seizures and ataxia, and die by 8 months of age (McCarty et al., 2005b). Similar brain and retinal phenotypes have

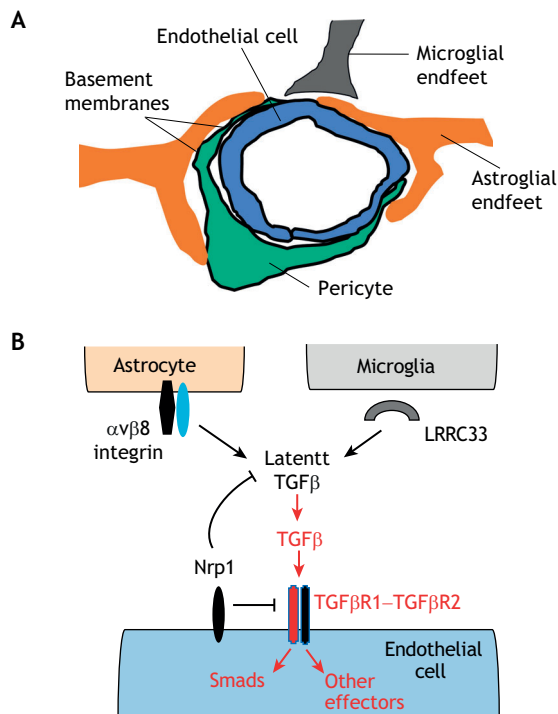

**Fig. 1. Integrin  $\alpha v \beta 8$  regulates neurovascular development via activation of latent TGF $\beta$ s.** (A) Schematic illustration of the multicellular composition of a brain neurovascular unit, comprised of vascular endothelial cells and pericytes that are juxtaposed with astrocyte and microglial end feet. There are at least two basement membranes (highlighted by dark black lines) within the neurovascular unit, highlighting the importance of cell–ECM contact and communication in neurovascular biology. (B)  $\alpha v \beta 8$  integrin expressed in perivascular astroglial cells cooperates with microglial cell-expressed and secreted LRRC33 to bind to latent TGF $\beta$ s embedded within the ECM. Interactions between integrin and LRRC33 induce structural rearrangements within the latent TGF $\beta$  complex, leading to paracrine activation of TGF $\beta$  receptor signaling in vascular endothelial cells. TGF $\beta$  receptor signaling via Smad transcription factors and other effectors leads to changes in gene expression programs that regulate angiogenesis during CNS development. Nrp1, which is expressed in brain endothelial cells, suppresses TGF $\beta$  signaling by serving as a counter-receptor for  $\alpha v \beta 8$  integrin, thereby blocking latent TGF $\beta$  activation. Genetic or pharmacological disruption of integrin engagement of TGF $\beta$  receptor signaling leads to severe CNS angiogenesis pathologies. The TGF $\beta$  receptor complex consists of a heterodimer of type 1 TGF $\beta$  receptor (indicated in red) and type 2 TGF $\beta$  receptor (indicated in black).

been reported for the CNS-specific conditional  $\beta 8$  integrin mutants (Arnold et al., 2012; Hirota et al., 2011; Proctor et al., 2005), suggesting that the neurological impairments that develop in  $\alpha v$  mutants are largely due to loss of function of  $\alpha v \beta 8$  integrin. In  $\alpha v$  and  $\beta 8$  knockout mice, the severe brain vascular pathologies that are so apparent in embryonic and neonatal periods mostly resolve by adulthood (Mobley et al., 2009). Resolution of the neurovascular pathologies occurs within a developmental period (three to four post-natal weeks) when CNS blood vessels transition from an angiogenic to a quiescent status (Ma and Huang, 2015), suggesting that  $\alpha v \beta 8$  integrin provides essential roles in modulating these active phases of CNS blood vessel development.

Indeed, selective deletion of *Itgav* or *Itgb8* in adult CNS astroglial cells does not lead to acute vascular pathologies (unpublished data, McCarty group). Recent data suggest that defective TGF $\beta$ -regulated fatty acid metabolism in brain vascular endothelial cells contribute to the adult-onset neurological deficits (Tiwary et al., 2018). In addition, the progressive neurological deficits in mice lacking  $\beta 8$

integrin in the CNS have been linked to defective TGF $\beta$  receptor signaling in microglial cells (Arnold et al., 2019). Hence, the progressive neurodegeneration phenotypes in adult *Itgb8*-mutant mice may be due to defective TGF $\beta$  signaling in multiple cell types of the brain.

TGF $\beta$  proteins activate multiple cytoplasmic pathways primarily through their transmembrane receptors, which contain serine/threonine kinase activities (Massague, 2008). Selective deletion of the type 2 TGF $\beta$  receptor gene *Tgfr2* in endothelial cells using the Alk1-Cre knock-in mouse model (Park et al., 2008) leads to defective brain angiogenesis and intracerebral hemorrhage (Nguyen et al., 2011), which is similar to phenotypes seen in  $\alpha v$  and  $\beta 8$  integrin mutant mice. In addition, tamoxifen-inducible deletion of *Tgfr2* in angiogenic endothelial cells results in defective vascular development, including aberrant brain and retinal angiogenesis and hemorrhage (Allinson et al., 2012). In support of the mouse genetic results detailed above, single nucleotide polymorphisms in the human  $\beta 8$  integrin gene (*ITGB8*) that alter protein expression and function have been identified in patients with brain vascular malformations (Su et al., 2010) and spontaneous brain hemorrhage (Dardiotis et al., 2017); these are also linked to defects in the TGF $\beta$  receptor signaling pathway (Cunha et al., 2017).

Neuropilin 1 (Nrp1) is a transmembrane protein that was first discovered as a receptor for secreted semaphorins, as well as vascular endothelial growth factor-A (Tata et al., 2015). Nrp1 has also been reported to act a receptor for TGF $\beta$  proteins in cultured cell types, including vascular endothelial cells (Glinka and Prud'homme, 2008). Genetic ablation of Nrp1 in endothelial cells leads to CNS neurovascular phenotypes that are similar to those observed in  $\alpha v \beta 8$  integrin and TGF $\beta$  knockouts (Gerhardt et al., 2004; Gu et al., 2003). Based on these data, the functional links between Nrp1,  $\alpha v \beta 8$  integrin and latent TGF $\beta$  activation and signaling were further analyzed by using genetically engineered mouse models and *in vitro* co-culture assays. Two groups independently reported that Nrp1 suppresses canonical TGF $\beta$  receptor signaling in endothelial cells of the brain (Aspalter et al., 2015; Hirota et al., 2015). Nrp1 expressed in the cerebral endothelium also blocks latent TGF $\beta$  activation in the ECM by serving as a counter-receptor *in trans* for  $\alpha v \beta 8$  integrin expressed in perivascular astroglial cells (Hirota et al., 2015). Similar vascular pathologies in Nrp1-deficient mice have been reported in the developing retina (Mack et al., 2016). Hence, a precise balance of TGF $\beta$  signaling in endothelial cells is essential for the control of sprouting angiogenesis during CNS development. Recently, a new and important component in the  $\alpha v \beta 8$ –TGF $\beta$  pathway has been identified. Leucine-rich repeat containing protein 33 (LRRC33, also known as NRROS), an extracellular protein secreted into the extracellular microenvironment by brain microglia is essential for latent TGF $\beta$  activation, possibly by cooperating with  $\alpha v \beta 8$  integrin in nearby astrocytes (Qin et al., 2018). Hence, astrocytes and microglia coordinately bind to latent TGF $\beta$ s in the brain ECM to mediate their activation and signaling in the brain vasculature (Fig. 1).

### $\alpha v \beta 8$ integrin and stem cell biology

In the subventricular zone of the post-natal rodent brain, neural stem and progenitor cells give rise to neuroblasts that migrate to the olfactory bulbs via the rostral migratory stream (Murase and Horwitz, 2004). Neuroblasts often use blood vessels and astrocytes that comprise 'glial tubes' as scaffolds and receive cues for directional migration (Bovetti et al., 2007; Whitman et al., 2009). Neural progenitors and neuroblasts express substantial levels of  $\alpha v \beta 8$  integrin, and ablation of *Itgav* or *Itgb8* via Nestin-Cre in mice results in defective olfactory bulb development (Mobley and McCarty, 2011). Subventricular zone tissue



explants cultured in ECM reveal that  $\alpha\text{v}\beta\text{8}$  integrin is essential for migration of the neuroblast chain, with mutant cells displaying adhesion and migration defects. Neural stem cells in the human brain are largely restricted to the dentate gyrus although some neurogenesis occurs within the subventricular zone during development (Sanai et al., 2011). In support of its roles in neural stem cell migration, early work using cultured brain astrocytes revealed critical roles for  $\alpha\text{v}\beta\text{8}$  integrin in cell migration and invasion (Milner et al., 1999, 2001). While essential roles for  $\alpha\text{v}\beta\text{8}$  integrin in human neurogenesis have not been reported, there are recent data suggesting important functions for  $\alpha\text{v}\beta\text{8}$  integrin in human-specific brain functions. For instance, quantitative RNA profiling of cultured organoids from humans and non-human primates have revealed gene signatures involved in human-specific brain evolution (Pollen et al., 2019), and, interestingly, *ITGB8* is one gene that is highly expressed in human cerebral organoids compared with organoids from non-human primates. This suggests that  $\alpha\text{v}\beta\text{8}$  integrin adhesion and signaling pathways promote structural complexity and/or higher order functions in the human brain.

Integrin  $\alpha\text{v}\beta\text{8}$  also has crucial roles in other stem cell niches outside of the CNS. In the bone marrow,  $\alpha\text{v}\beta\text{8}$  integrin in non-myelinating Schwann cells has been reported to regulate hematopoietic stem cell self-renewal and differentiation through the regulation of latent TGF $\beta$  activation and signaling (Yamazaki et al., 2011). Genetic ablation of TGF $\beta$  receptor signaling in hematopoietic stem cells, or ablation of  $\alpha\text{v}\beta\text{8}$  integrin-expressing Schwann cells in the bone marrow results in diminished hematopoiesis (Yamazaki et al., 2011). A prior report has shown that  $\alpha\text{v}\beta\text{8}$  integrin in myelinating Schwann cells is a receptor for fibrin in the ECM, and directly binds to the intermediate filament factor glial fibrillary acidic protein (GFAP) (Chernousov and Carey, 2003). However, genetic deletion of *Itgav* or *Itgb8* in Schwann cells does not lead to defects in axonal myelination (Laura Feltri, personal communication). Finally,  $\alpha\text{v}\beta\text{8}$  integrin has been reported to have essential roles in the differentiation of mesenchymal stem cells (MSCs) into chondrocytes, a cell type that is crucial for cartilage functions (LaPointe et al., 2013). *In vitro* differentiation of MSCs toward the chondrocyte lineage correlates with increased expression of *ITGB8* mRNA, with RNAi-mediated silencing of *ITGB8* expression resulting in suppressed chondrocyte development (LaPointe et al., 2013).

#### $\alpha\text{v}\beta\text{8}$ integrin in immune system homeostasis

$\alpha\text{v}\beta\text{8}$  integrin-dependent regulation of TGF $\beta$  signaling is also important for the normal functions of many immune cells. These immune-cell-specific roles were first discovered more than a decade ago when studying the effects of *Itgav* deletion in hematopoietic stem cells (Lacy-Hulbert et al., 2007). Although the mutant mice did not display any defects in hematopoiesis, many adult mutants died prematurely and showed intestinal inflammation with spontaneous colorectal adenocarcinomas (Lacy-Hulbert et al., 2007). Concurrent experiments by another group that used immune-cell-specific Cre mouse models revealed that  $\alpha\text{v}\beta\text{8}$  integrin in surveilling intestinal dendritic cells is essential for homeostasis of the gut epithelium through its role in the activation of latent TGF $\beta$ s (Travis et al., 2007). Similar roles for  $\alpha\text{v}\beta\text{8}$  integrin has subsequently been reported in the human intestinal tract (Fenton et al., 2017). Paracrine factors within the tissue microenvironment also have important roles in regulating *Itgb8* expression and functions in dendritic cells (Boucard-Jourdin et al., 2016). In addition, epigenetic regulatory mechanisms can also impact *Itgb8* gene expression. For example, the micro RNAs (miRs) miR-19b-3p and miR-106-5p suppress *ITGB8* expression in intestinal epithelial cells, and these events drive the formation of

colorectal carcinomas (Fang et al., 2011; Huang et al., 2017). Finally, important homeostatic roles for  $\alpha\text{v}\beta\text{8}$  integrin have also been reported in the skin, where integrin-expressing dendritic cells (Mani et al., 2019) promote TGF $\beta$  activation and signaling in resident memory T cells (Hirai et al., 2019; Mohammed et al., 2016). TGF $\beta$ s can also synergize with IL-1 $\beta$  to stimulate expression and secretion of the chemokine CCL20 (Brand et al., 2015), which is involved in T cell recruitment and activation.  $\alpha\text{v}\beta\text{8}$  integrin expressed in regulatory T cells can also inhibit T cell-mediated inflammation via TGF $\beta$  activation and signaling (Worthington et al., 2015), whereas T cells that lack integrin expression are incapable of suppressing the inflammatory response. Glycoprotein A repetitions predominate (GARP; also known as LRRC32) is a transmembrane protein expressed in T regulatory cells that coordinates with  $\alpha\text{v}\beta\text{8}$  integrin to activate latent TGF $\beta$ s (Lienart et al., 2018). The influence of GARP in regulating immune inflammation is similar to roles for LRRC33 in facilitating integrin-mediated TGF $\beta$  activation in the CNS (Qin et al., 2018). In addition, integrin-mediated TGF $\beta$  activation is also linked to other immune responses, including Th17 cell induction in experimental autoimmune disorders (Araya et al., 2006; Melton et al., 2010) and intestinal monocyte control of immune tolerance (Kelly et al., 2018).

#### Integrin $\alpha\text{v}\beta\text{8}$ and organ fibrosis

Aberrant communication between epithelial cells with fibroblasts and immune cells in the lung, liver, kidney and other organs can lead to fibrosis, or pathological stromal cell hyperproliferation and abnormal ECM deposition (Kim et al., 2018). For example, interactions between pulmonary epithelial and mesenchymal fibroblasts within the epithelial-mesenchymal trophic unit (EMTU) of the lung play important roles in promoting normal organ development and physiology. *Itgb8* expression in lung epithelial cells can be regulated at the transcriptional level by multiple pathways. In particular, a signaling cascade involving IL-1 $\beta$ , p38 $\alpha$  kinase, and the transcription factors SP3 and AP-1 have been shown to induce *ITGB8* expression in human epithelial cells (Markovics et al., 2010, 2011). Furthermore, by using *ex vivo* models of the EMTU, it has been shown that  $\alpha\text{v}\beta\text{8}$  and  $\alpha\text{v}\beta\text{6}$  integrins that are expressed in airway epithelial cells promote the activation of latent TGF $\beta$  proteins, leading to the recruitment of resident immune cells (Araya et al., 2006). Deregulation of integrin-mediated TGF $\beta$  activation in the EMTU results in lung fibrosis and leads to chronic obstructive pulmonary disease, as well as asthma (Araya et al., 2007; Kitamura et al., 2011; Minagawa et al., 2014). Liver fibrosis that results from colorectal carcinoma metastasis also involves  $\alpha\text{v}$  integrin-dependent collagen deposition (Conti et al., 2008), which likely is triggered by latent TGF $\beta$  activation. TGF $\beta$  receptor signaling via Smads and other effectors stimulates synthesis of ECM proteins including collagens (McCarty, 2008). Furthermore, fibrotic pathologies in the kidney are promoted by  $\alpha\text{v}\beta\text{8}$  integrin expressed by mesangial cells via activation of TGF $\beta$ s (Lakhe-Reddy et al., 2014). Finally, interactions between  $\alpha\text{v}\beta\text{8}$  integrin in mesangial cells and CD31 (also known as platelet endothelial cell adhesion molecule 1; PECAM1) in renal endothelial cells has been reported as a mechanism to balance latent TGF $\beta$  activation in the normal kidney. These interactions are altered during renal fibrosis, leading to hyperactivation of TGF $\beta$  signaling in the stroma (Khan et al., 2011).

#### Integrin $\alpha\text{v}\beta\text{8}$ as a viral receptor and mediator of membrane fusion

Various viruses utilize  $\alpha\text{v}\beta\text{8}$  integrin as a receptor for cell entry and infection. For instance, the herpes simplex virus (HSV) gH-gL

binary protein complex binds directly to the extracellular domain of  $\alpha\beta8$  integrin in epithelial and neuronal cell types (Gianni et al., 2015). This interaction with  $\alpha\beta8$  integrin leads to conformational changes in gH–gL, which initiate endocytosis of HSV through membrane fusion mechanisms that involve dynamin 2 (Gianni et al., 2013; Hutt-Fletcher and Chesnokova, 2010). Similar roles for the gH–gL complex have been reported for Epstein–Barr virus infection of epithelial cells and B cells (Hutt-Fletcher and Chesnokova, 2010). Similarly, the foot-and-mouth disease virus has also been reported to bind directly to  $\alpha\beta8$  integrin through the viral VP1 protein, which contains an RGD peptide sequence. Here, domain-swapping experiments reveal that entry of foot-and-mouth disease virus into cells involves the cytoplasmic domain of  $\beta8$  integrin (Jackson et al., 2004), suggesting that this domain is important for the extracellular structure of integrin extracellular structure and/or intracellular downstream signaling pathways that are involved in viral infection.

Finally, genomic analyses of severe acute respiratory syndrome coronavirus 2 (SARS-CoV2), which has caused the COVID-19 pandemic, reveals an RGD sequence in the viral spike (S) protein that is lacking in other coronaviruses (Sigrist et al., 2020). The RGD sequence is not within the well-characterized S-protein-binding domain for the angiotensin converting enzyme 2 (ACE2) receptor. While the functional significance of the RGD motif in the S protein remains to be determined experimentally, it is enticing to speculate that  $\alpha\beta8$  integrin may modulate binding and entry of SARS-CoV2, possibly by forming a cell surface complex with ACE2 in lung epithelial cells. Furthermore, there are reports of COVID-19 patients developing cerebral edema and severe neurological deficits (Mao et al., 2020), suggesting that SARS-CoV2 is causing encephalitis, possibly via RGD-dependent engagement with  $\alpha\beta8$  integrin.

### Integrin $\alpha\beta8$ functions in cancer initiation and progression

Abnormal regulation of  $\alpha\beta8$  integrin-mediated adhesion and downstream signaling pathways (see below) contribute to the initiation and progression of various cancers. Early work suggested that lung adenocarcinoma cells that express low levels of  $\alpha\beta8$  integrin generated more malignant tumors in xenograft models, and these events correlated with reduced activation of latent TGF $\beta$  and downstream signaling (Cambier et al., 2000). More recent studies in stratified epithelial tissues reveal that  $\alpha\beta8$  integrin-mediated TGF $\beta$  signaling suppresses basal epithelial cell growth via autocrine feedback pathways. Deregulation of these events in mice, either through genetic deletion of *Itgav* (McCarty et al., 2008) or *Tgfbr2*, the gene encoding TGF $\beta$  receptor type-2 (Guasch et al., 2007), leads to the initiation of squamous cell carcinoma. Furthermore, experiments using transgenic mouse models of squamous cell carcinoma (Savar et al., 2015), as well as human squamous cell carcinoma samples (Hsu et al., 2011), confirm that a reduced expression of  $\alpha\beta8$  integrin correlates with higher-grade tumors. However, in contrast to the data from squamous cell carcinomas, upregulation of  $\beta8$  integrin expression in pancreatic cancer cells leads to more malignant disease, as well as to an enhanced resistance to chemotherapy (Jin et al., 2019). Hence, increased levels of  $\alpha\beta8$  integrin can have both pro-tumorigenic or anti-tumorigenic activities, depending on the type of cancer.

Glioblastoma (GBM) is a highly aggressive primary tumor type with unique blood vessel pathologies, including uncontrolled microvascular proliferation, hemorrhage and edema (Lathia et al., 2015). Hyperactive TGF $\beta$  receptor signaling in GBM cells drives growth and survival (Penuelas et al., 2009).  $\beta8$  promotes the perivascular growth of GBM cells, as well as their invasion along blood vessels through its role in the activation of latent TGF $\beta$ s.

Specifically, it was shown that GBM cell lines that express low levels of integrin  $\beta8$  are less invasive, whereas cells that have high levels of integrin  $\beta8$  give rise to tumor growth and perivascular invasion (Reyes et al., 2013a; Tchaicha et al., 2011) (Fig. 2). More recently, my group has discovered that  $\alpha\beta8$  integrin-expressing human GBM cells freshly sorted from patient tumors generate more malignant tumors in the mouse brain in comparison to GBM cells that express low or undetectable levels of  $\alpha\beta8$  integrin (Guerrero et al., 2017). In addition,  $\alpha\beta8$  integrin can functionally interact with Nrp1 in GBM cells to activate TGF $\beta$  signaling and promote cell cycle progression (Kwiatkowski et al., 2017). Similar pro-tumorigenic roles have been reported for  $\alpha\beta8$  integrin in GBM stem cells in promoting tumor recurrence following radiation and chemotherapy (Malric et al., 2019). In addition, miR-142-3p and miR-93 negatively regulate *ITGB8* expression in glioma cells during brain tumor growth and invasion and thus might be a cause for their resistance to therapy (Li et al., 2018; Malekpour Afshar et al., 2017). Finally, in metastatic brain tumors there is a correlation between  $\alpha\beta8$  integrin expression and severity of metastatic lesions (Schittenhelm et al., 2013). In general, these various data indicate that increased expression of  $\alpha\beta8$  integrin leads to enhanced activation of TGF $\beta$  receptor signaling and these events collectively promote tumor cell growth and invasion.

### Regulation of intracellular signaling effectors by $\alpha\beta8$ integrin

Most if not all of the experimental evidence indicates that the primary biological function for  $\alpha\beta8$  integrin is the control of cell–cell communication in multiple tissues. However,  $\alpha\beta8$  integrin also regulates intracellular signaling pathways, although these pathways are distinct from other integrins (Fig. 3). As noted above, the amino acid sequence of the  $\beta8$  integrin cytoplasmic tail is not homologous to that of other  $\beta$  subunits. Most integrin  $\beta$  subunits, including  $\beta1A$ ,  $\beta2$ ,  $\beta3A$ ,  $\beta5$  and  $\beta6$ , utilize NPXY motifs to interact

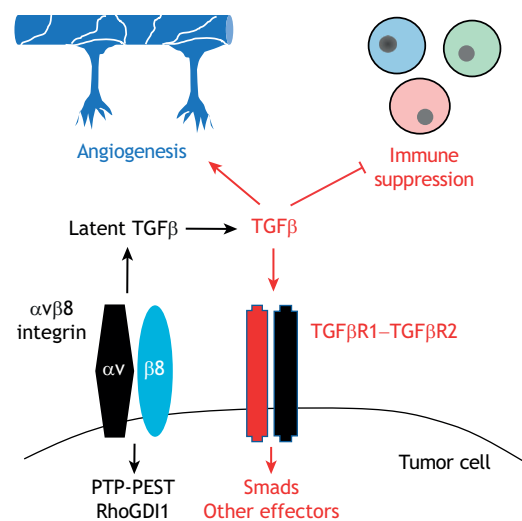

**Fig. 2. Integrin  $\alpha\beta8$  modulates cell–ECM adhesion and signaling events in the cancer microenvironment.**  $\alpha\beta8$  integrin expressed in cancer cells (shown here is an example of the brain cancer GBM) mediates the activation of ECM-bound latent TGF $\beta$ s in the tumor microenvironment. Active TGF $\beta$  subsequently engages with its receptors to coordinately activate paracrine angiogenic pathways in vascular endothelial cells and suppress T cell activation. In addition, TGF $\beta$  signaling in cancer cells activates intracellular signaling pathways involving PTP-PEST, RhoGDI1 and other effectors that promote growth and invasion in the tissue microenvironment.

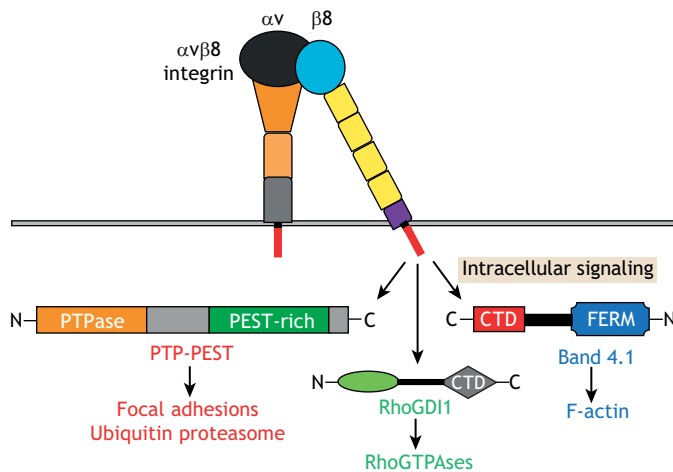

**Fig. 3. A summary of intracellular signaling pathways regulated by  $\alpha\beta 8$  integrin.** The cytoplasmic domain of  $\beta 8$  integrin can bind to various intracellular signaling effectors, including the non-receptor protein tyrosine phosphatase PTP-PEST, which subsequently regulates p130Cas activities in focal adhesions and VCP/p97 in the ubiquitin proteasome system.  $\beta 8$  integrin also binds directly to the Rho GTPase regulatory factor RhoGDI1, which controls the activation states of Rac1 and Cdc42 GTPase. Finally, the  $\beta 8$  integrin cytoplasmic domain can link to the actin cytoskeleton through interactions with Band 4.1 proteins.

directly with FERM domain proteins, such as talins and kindlins, which in turn controls cytoskeletal dynamics (Ginsberg, 2014), whereas  $\beta 8$  lacks these FERM-domain-binding motifs suggesting that  $\alpha\beta 8$  integrin signaling involved the recruitment of distinct effector proteins.

The  $\beta 8$  integrin cytoplasmic domain has been shown to interact with RhoGDI1 (also known as ARHGDI1), a 25 kDa protein involved in regulation of Rho GTPase signaling (Lakhe-Reddy et al., 2006; McCarty et al., 2005a). There are at least three members of the RhoGDI family, and they function to extract active Rho GTPases from membranes to sequester them in the cytoplasm (Boulter et al., 2010; Garcia-Mata et al., 2011; Moissoglu and Schwartz, 2006). Thus, RhoGDIs act in concert with guanine nucleotide exchange factors (GEFs) and GTPase-activating proteins (GAPs) to balance Rho activation. Integrin  $\alpha\beta 8$  recruits RhoGDI1 to the leading edge of the cell in order to extract activated Rho proteins from the plasma membrane and sequester them in the cytoplasm (Lakhe-Reddy et al., 2006; Reyes et al., 2013b). Accordingly, silencing RhoGDI1 or uncoupling RhoGDI1– $\alpha\beta 8$  integrin associations by mutating integrin-recruitment sites in RhoGDI1 (see below) results in hyperactivation of the Rho family members Rac1 and Cdc42 with subsequent impairment of cell migration (Reyes et al., 2013b). Furthermore, the defective neurogenesis in  $\alpha\beta 8$  integrin mutant mice have been linked to alterations in Rho GTPase activation (Lee et al., 2015). Moreover, during zebrafish brain development, interactions between  $\alpha\beta 8$  integrin and  $\beta$ Pix (also known as ARHGEF7), a scaffold protein with GEF activities that binds many proteins including the GAP Git1, have been identified (Liu et al., 2012). Mutations in zebrafish *arhgef7* or *itgb8* give rise to pathological angiogenesis and cerebral edema (Liu et al., 2012), although the exact mechanisms underlying these vascular pathologies remain unknown.

RhoGDIs are inactivated by phosphorylation on Y156 by the non-receptor tyrosine kinase Src; this diminishes their affinity for GDP-bound Rho proteins and induces the translocation of RhoGDI to the leading edge of the cell (DerMardirossian et al., 2006; Wu et al., 2009). My group has found that  $\alpha\beta 8$  integrin binds to the

non-receptor protein tyrosine phosphatase (PTP)-PEST (also known as PTPN12), and that this interaction promotes RhoGDI1 dephosphorylation, which results in its release from the membrane and sequestration of GDP-bound Rac1 and Cdc42 in the cytoplasm (Lee et al., 2015). PTP-PEST contains an N-terminal catalytic domain and proline, glutamate, serine and threonine (PEST)-rich sequences in the C-terminus. PTP-PEST is broadly expressed and has important roles in promoting cell adhesion and motility during development (Zheng and Lu, 2013). It has been recently shown that  $\alpha\beta 8$  integrin signaling via PTP-PEST and the ubiquitin proteasome system component p97 (also known as VCP) is important for promoting GBM cell invasion by increasing focal adhesion turnover at the leading edge (Chen et al., 2018).

Similar to what is seen for other integrins,  $\alpha\beta 8$  integrin serves as a link between the ECM and the cytoskeleton. Genetic screens have revealed that the  $\beta 8$  integrin cytoplasmic tail interacts with the FERM domain-containing protein Band 4.1B (also known as EPB41L3), which is important for the development of the CNS (McCarty et al., 2005a). Interestingly,  $\beta 8$  integrin binds directly to Band 4.1B through its C-terminal domain (CTD), but does not interact with the FERM domain of Band 4.1B (McCarty et al., 2005a). Mass spectrometry experiments also identified spinophilin (PPP1R9B) as a protein that binds to the  $\beta 8$  integrin cytoplasmic tail (Cheerathodi et al., 2016). Spinophilin is a 130 kDa cytoskeletal scaffolding protein that contains PDZ, protein phosphatase 1 (PP1) and actin-binding domains; it is highly expressed in the brain where it interacts with various transmembrane proteins (Carnero, 2012). Human GBM cells that lack spinophilin expression owing to RNAi-mediated gene silencing or CRISPR gene editing show increased numbers of filopodia *in vitro*, as well as enhanced invasive growth in the mouse brain, and all these pro-invasive properties have been shown to correlate with reduced levels of Rac1 activity (Cheerathodi et al., 2016).

While the recruitment of signaling effectors is essential for  $\alpha\beta 8$  integrin-driven cell migration and invasion especially in cancer (Reyes et al., 2013a), it remains to be determined whether intracellular signaling is coupled to latent TGF $\beta$  engagement and signaling. Recent 3D structure data suggest that conversion from the extended-closed conformation to a more ECM ligand-engaged state requires coupling to the cytoskeleton (Wang et al., 2019), likely via inside-out mechanisms involving Band 4.1 proteins and/or other cytoplasmic effectors such as spinophilin, which provide links to the cytoskeleton. It is intriguing to speculate that PTP-PEST also promotes ECM interactions by regulating the phosphorylation status of the  $\beta 8$  cytoplasmic domain or via dephosphorylation of spinophilin and/or Band 4.1 proteins. Alternatively,  $\alpha\beta 8$  integrin-mediated recruitment of intracellular signaling effectors may occur as a result of ECM ligand binding through classic outside-in signaling. It would be interesting to use genetic strategies to delete the  $\beta 8$  integrin cytoplasmic tail and determine whether this impacts latent TGF $\beta$  activation and signaling.

### Conclusions and future directions

The importance of  $\alpha\beta 8$  integrin in promoting cell–cell communication during the initiation and progression of several diseases, ranging from immune disorders to cancer, makes this integrin as well as its latent TGF $\beta$  ECM ligands attractive targets for possible therapeutic interventions. In particular, the specificity of  $\alpha\beta 8$  integrin for RGD(LXX(L/I)) sequences within its ligands make it a suitable target for the use of function-blocking antibodies, as well as small-molecule inhibitors that block its adhesion to the ECM. Similar strategies have been employed to target the related  $\alpha$ v-containing integrins  $\alpha\beta 3$  and  $\alpha\beta 5$  by using the cyclic RGD compound



cilengitide as an anti-angiogenic agent or an anti-tumor cell growth agent, although these efforts have largely failed in clinical trials (Weller et al., 2016). However, strategies to target  $\alpha v \beta 8$  integrin may be more effective given its atypical extended-closed structure (Wang et al., 2017; 2019) and its unique mechanisms of latent TGF $\beta$  engagement and activation (Campbell et al., 2020). It will be interesting to determine whether neutralizing anti- $\beta 8$  integrin antibodies or RGDLXX(L/I)-containing peptide mimetics could be effective in treating fibrosis. These agents might also serve as effective anti-viral strategies to block binding between  $\alpha v \beta 8$  integrin and HSV or FMDV proteins and subsequent membrane fusion events required for viral entry and infection.

It is worth keeping in mind that blocking  $\alpha v \beta 8$  integrin may have broad effects that are related to the subsequent inhibition of TGF $\beta$  activation and signaling. Immune checkpoint inhibitors have shown limited efficacy in many cancer clinical trials, including primary brain and pancreatic tumors, likely due to a suppression of immune cell activation by alternative pathways. TGF $\beta$  activation is one pathway that tumor cells utilize to suppress the immune system and evade blockade by immune-checkpoint inhibitors (Jiao et al., 2019) (Fig. 2). Therefore, blocking TGF $\beta$  signaling or the activation of latent TGF $\beta$  activation through  $\alpha v \beta 8$  integrin inhibition in cancer may be an effective strategy to augment the effects of immune-checkpoint inhibitors. Indeed, roles for  $\alpha v \beta 8$  integrin and TGF $\beta$  proteins in the suppression of T cells have recently been shown in various tumor types (Stockis et al., 2017; Takasaka et al., 2018). However, blocking  $\alpha v \beta 8$  integrin-mediated TGF $\beta$  activation in immune cells outside of the tumor microenvironment may lead to unwanted side effects, such as for example, the intestinal autoimmune phenotypes observed in the mice lacking  $\alpha v$  or  $\beta 8$  integrin expression in immune cells. Additional strategies to inhibit  $\alpha v \beta 8$  integrin could involve blocking intracellular signaling through the  $\beta 8$  cytoplasmic tail. In this context, synthetic peptides and/or small molecules that block the activation of PTP-PEST and other signaling proteins could be an effective strategy for inhibiting tumor cell growth and invasion. It will also be critical to determine the relative importance of intracellular signaling pathways and whether they are coupled to ECM engagement, especially involving the latent TGF $\beta$  complex.

In summary, the past 15 years have seen major advances in our understanding of roles for  $\alpha v \beta 8$  integrin, its latent TGF $\beta$  ECM ligands and cytoplasmic effector proteins in development, physiology and disease. Important future directions will involve using advanced proteomic technologies to identify and characterize additional ECM protein ligands and intracellular signaling partners for  $\alpha v \beta 8$  integrin. Efforts to identify the ‘adhesome network’ for various other integrins have yielded novel findings concerning the dynamic nature of integrin adhesion and signaling (Geiger and Yamada, 2011). In addition, use of quantitative RNA sequencing strategies will be important to identify  $\alpha v \beta 8$  integrin-dependent gene expression profiles in single cells isolated from healthy and diseased tissues. Furthermore, it will be important to elucidate the molecular mechanisms that lead to conversion of the extended-closed  $\alpha v \beta 8$  extracellular domains into their fully active conformation, including the contributions from cytoplasmic effector proteins such as Band 4.1B and/or extracellular regulatory factors, such as LRRC33 or GARP. Additionally, it will be necessary to determine how the  $\alpha v \beta 8$  integrin–TGF $\beta$  pathway is functionally connected to other signaling networks, and how these events are linked to development and disease. The potential blockade of these pathways could result in effective therapies to benefit patients with diseases that are associated with  $\alpha v \beta 8$  integrin and/or TGF $\beta$  dysfunction.

## Acknowledgements

I would like to thank the members of the McCarty laboratory for insightful comments on the manuscript. I tried to be as comprehensive in citing experimental studies, but I apologize to any colleagues if relevant publications were not cited.

## Competing interests

The authors declare no competing or financial interests.

## Funding

My work was supported, in part, by grants from the National Institutes of Health (R01NS087635, R21NS103841 and P50CA127001), the Cancer Prevention and Research Institute of Texas (RP180220), the Brockman Foundation, and the Terry L. Chandler Foundation. Deposited in PMC for release after 12 months.

## References

- Allinson, K. R., Lee, H. S., Fruttiger, M., McCarty, J. H. and Arthur, H. M. (2012). Endothelial expression of TGF $\beta$  type II receptor is required to maintain vascular integrity during postnatal development of the central nervous system. *PLoS ONE* **7**, e39336. doi:10.1371/journal.pone.0039336
- Aluwihare, P., Mu, Z., Zhao, Z., Yu, D., Weinreb, P. H., Horan, G. S., Violette, S. M. and Munger, J. S. (2009). Mice that lack activity of  $\alpha v \beta 6$ - and  $\alpha v \beta 8$ -integrins reproduce the abnormalities of Tgfb1- and Tgfb3-null mice. *J. Cell Sci.* **122**, 227–232. doi:10.1242/jcs.035246
- Araya, J., Cambier, S., Morris, A., Finkbeiner, W. and Nishimura, S. L. (2006). Integrin-mediated transforming growth factor- $\beta$  activation regulates homeostasis of the pulmonary epithelial-mesenchymal trophic unit. *Am. J. Pathol.* **169**, 405–415. doi:10.2353/ajpath.2006.060049
- Araya, J., Cambier, S., Markovics, J. A., Wolters, P., Jablons, D., Hill, A., Finkbeiner, W., Jones, K., Broaddus, V. C., Sheppard, D. et al. (2007). Squamous metaplasia amplifies pathologic epithelial-mesenchymal interactions in COPD patients. *J. Clin. Invest.* **117**, 3551–3562. doi:10.1172/JCI132526
- Arnold, T. D., Ferrero, G. M., Qiu, H., Phan, I. T., Akhurst, R. J., Huang, E. J. and Reichardt, L. F. (2012). Defective retinal vascular endothelial cell development as a consequence of impaired integrin  $\alpha v \beta 8$ -mediated activation of transforming growth factor- $\beta$ . *J. Neurosci.* **32**, 1197–1206. doi:10.1523/JNEUROSCI.5648-11.2012
- Arnold, T. D., Lizama, C. O., Cautivo, K. M., Santander, N., Lin, L., Qiu, H., Huang, E. J., Liu, C., Mukoyama, Y. S., Reichardt, L. F. et al. (2019). Impaired  $\alpha v \beta 8$  and TGF $\beta$  signaling lead to microglial dysmaturation and neuromotor dysfunction. *J. Exp. Med.* **216**, 900–915. doi:10.1084/jem.20181290
- Aspalter, I. M., Gordon, E., Dubrac, A., Ragab, A., Narloch, J., Vizan, P., Geudens, I., Collins, R. T., Franco, C. A., Abrahams, C. L. et al. (2015). Alk1 and Alk5 inhibition by Nrp1 controls vascular sprouting downstream of Notch. *Nat. Commun.* **6**, 7264. doi:10.1038/ncomms8264
- Bader, B. L., Rayburn, H., Crowley, D. and Hynes, R. O. (1998). Extensive vasculogenesis, angiogenesis, and organogenesis precede lethality in mice lacking all  $\alpha v$  integrins. *Cell* **95**, 507–519. doi:10.1016/S0092-8674(00)81618-9
- Ballabh, P. (2010). Intraventricular hemorrhage in premature infants: mechanism of disease. *Pediatr. Res.* **67**, 1–8. doi:10.1203/PDR.0b013e3181c1b176
- Barcellos-Hoff, M. H., Derynck, R., Tsang, M. L. and Weatherbee, J. A. (1994). Transforming growth factor-beta activation in irradiated murine mammary gland. *J. Clin. Invest.* **93**, 892–899. doi:10.1172/JCI117045
- Boucard-Jourdin, M., Kugler, D., Endale Ahanda, M. L., This, S., De Calisto, J., Zhang, A., Mora, J. R., Stuart, L. M., Savill, J., Lacy-Hulbert, A. et al. (2016).  $\beta 8$  integrin expression and activation of TGF- $\beta$  by intestinal dendritic cells are determined by both tissue microenvironment and cell lineage. *J. Immunol.* **197**, 1968–1978. doi:10.4049/jimmunol.1600244
- Boulter, E., Garcia-Mata, R., Guilluy, C., Dubash, A., Rossi, G., Brenwald, P. J. and Burridge, K. (2010). Regulation of Rho GTPase crosstalk, degradation and activity by RhoGDI1. *Nat. Cell Biol.* **12**, 477–483. doi:10.1038/ncb2049
- Bovetti, S., Hsieh, Y. C., Bovolin, P., Perroteau, I., Kazunori, T. and Puche, A. C. (2007). Blood vessels form a scaffold for neuroblast migration in the adult olfactory bulb. *J. Neurosci.* **27**, 5976–5980. doi:10.1523/JNEUROSCI.0678-07.2007
- Brand, O. J., Somanath, S., Moermans, C., Yanagisawa, H., Hashimoto, M., Cambier, S., Markovics, J., Bondesson, A. J., Hill, A., Jablons, D. et al. (2015). Transforming growth factor- $\beta$  and interleukin-1 $\beta$  signaling pathways converge on the chemokine CCL20 promoter. *J. Biol. Chem.* **290**, 14717–14728. doi:10.1074/jbc.M114.630368
- Calderwood, D. A., Zent, R., Grant, R., Rees, D. J., Hynes, R. O. and Ginsberg, M. H. (1999). The Talin head domain binds to integrin  $\beta$  subunit cytoplasmic tails and regulates integrin activation. *J. Biol. Chem.* **274**, 28071–28074. doi:10.1074/jbc.274.40.28071
- Cambier, S., Mu, D. Z., O’Connell, D., Boylen, K., Travis, W., Liu, W. H., Broaddus, V. C. and Nishimura, S. L. (2000). A role for the integrin  $\alpha v \beta 8$  in the negative regulation of epithelial cell growth. *Cancer Res.* **60**, 7084–7093.
- Cambier, S., Gline, S., Mu, D., Collins, R., Araya, J., Dolganov, G., Einheber, S., Boudreau, N. and Nishimura, S. L. (2005). Integrin  $\alpha v \beta 8$ -mediated activation of

- transforming growth factor- $\beta$  by perivascular astrocytes: an angiogenic control switch. *Am. J. Pathol.* **166**, 1883-1894. doi:10.1016/S0002-9440(10)62497-2
- Campbell, M. G., Cormier, A., Ito, S., Seed, R. I., Bondesson, A. J., Lou, J., Marks, J. D., Baron, J. L., Cheng, Y. and Nishimura, S. L.** (2020). Cryo-EM reveals integrin-mediated TGF- $\beta$  activation without release from latent TGF- $\beta$ . *Cell* **180**, 490-501.e16. doi:10.1016/j.cell.2019.12.030
- Carnero, A.** (2012). Spinophilin: a new tumor suppressor at 17q21. *Curr. Mol. Med.* **12**, 528-535. doi:10.2174/156652412800619987
- Cheerathodi, M., Avci, N. G., Guerrero, P. A., Tang, L. K., Popp, J., Morales, J. E., Chen, Z., Carnero, A., Lang, F. F., Ballif, B. A. et al.** (2016). The cytoskeletal adapter protein spinophilin regulates invadopodia dynamics and tumor cell invasion in glioblastoma. *Mol. Cancer Res.* **14**, 1277-1287. doi:10.1158/1541-7786.MCR-16-0251
- Chen, Z., Morales, J. E., Guerrero, P. A., Sun, H. and McCarty, J. H.** (2018). STPN12/PTP-PEST regulates phosphorylation-dependent ubiquitination and stability of focal adhesion substrates in invasive glioblastoma cells. *Cancer Res.* **78**, 3809-3822. doi:10.1158/0008-5472.CAN-18-0085
- Chernousov, M. A. and Carey, D. J.** (2003).  $\alpha$ V $\beta$ 8 integrin is a Schwann cell receptor for fibrin. *Exp. Cell Res.* **291**, 514-524. doi:10.1016/S0014-4827(03)00409-9
- Conti, J. A., Kendall, T. J., Bateman, A., Armstrong, T. A., Papa-Adams, A., Xu, Q., Packham, G., Primrose, J. N., Benyon, R. C. and Iredale, J. P.** (2008). The desmoplastic reaction surrounding hepatic colorectal adenocarcinoma metastases aids tumor growth and survival via  $\alpha$ v integrin ligation. *Clin. Cancer Res.* **14**, 6405-6413. doi:10.1158/1078-0432.CCR-08-0816
- Cormier, A., Campbell, M. G., Ito, S., Wu, S., Lou, J., Marks, J., Baron, J. L., Nishimura, S. L. and Cheng, Y.** (2018). Cryo-EM structure of the  $\alpha$ v $\beta$ 8 integrin reveals a mechanism for stabilizing integrin extension. *Nat. Struct. Mol. Biol.* **25**, 698-704. doi:10.1038/s41594-018-0093-x
- Cunha, S. I., Magnusson, P. U., Dejana, E. and Lampugnani, M. G.** (2017). Deregulated TGF- $\beta$ /BMP signaling in vascular malformations. *Circ. Res.* **121**, 981-999. doi:10.1161/CIRCRESAHA.117.309930
- Dardiotis, E., Siokas, V., Zafeiridis, T., Paterakis, K., Tsvigoulis, G., Dardioti, M., Grigoriadis, S., Simeonidou, C., Deretzi, G., Zintzaras, E. et al.** (2017). Integrins AV and B8 gene polymorphisms and risk for intracerebral hemorrhage in greek and polish populations. *Neuromolecular Med.* **19**, 69-80. doi:10.1007/s12017-016-8429-3
- DerMardirossian, C., Rocklin, G., Seo, J. Y. and Bokoch, G. M.** (2006). Phosphorylation of RhoGDI by Src regulates Rho GTPase binding and cytosol-membrane cycling. *Mol. Biol. Cell* **17**, 4760-4768. doi:10.1091/mbc.e06-06-0533
- Dong, X., Hudson, N. E., Lu, C. and Springer, T. A.** (2014). Structural determinants of integrin  $\beta$ -subunit specificity for latent TGF- $\beta$ . *Nat. Struct. Mol. Biol.* **21**, 1091-1096. doi:10.1038/nsmb.2905
- Dong, X., Zhao, B., Iacob, R. E., Zhu, J., Koksai, A. C., Lu, C., Engen, J. R. and Springer, T. A.** (2017). Force interacts with macromolecular structure in activation of TGF- $\beta$ . *Nature* **542**, 55-59. doi:10.1038/nature21035
- Fang, L., Deng, Z., Shatseva, T., Yang, J., Peng, C., Du, W. W., Yee, A. J., Ang, L. C., He, C., Shan, S. W. et al.** (2011). MicroRNA miR-93 promotes tumor growth and angiogenesis by targeting integrin- $\beta$ 8. *Oncogene* **30**, 806-821. doi:10.1038/onc.2010.465
- Fenton, T. M., Kelly, A., Shuttleworth, E. E., Smedley, C., Atakilit, A., Powrie, F., Campbell, S., Nishimura, S. L., Sheppard, D., Levison, S. et al.** (2017). Inflammatory cues enhance TGF $\beta$  activation by distinct subsets of human intestinal dendritic cells via integrin  $\alpha$ v $\beta$ 8. *Mucosal Immunol.* **10**, 624-634. doi:10.1038/mi.2016.94
- Garcia-Mata, R., Boulter, E. and Burridge, K.** (2011). The 'invisible hand': regulation of RHO GTPases by RHOGDIs. *Nat. Rev. Mol. Cell Biol.* **12**, 493-504. doi:10.1038/nrm3153
- Geiger, B. and Yamada, K. M.** (2011). Molecular architecture and function of matrix adhesions. *Cold Spring Harb. Perspect Biol.* **3**, a005033. doi:10.1101/cshperspect.a005033
- Gerhardt, H., Ruhrberg, C., Abramsson, A., Fujisawa, H., Shima, D. and Betsholtz, C.** (2004). Neuropilin-1 is required for endothelial tip cell guidance in the developing central nervous system. *Dev. Dyn.* **231**, 503-509. doi:10.1002/dvdy.20148
- Gianni, T., Salvioli, S., Chesnokova, L. S., Hutt-Fletcher, L. M. and Campadelli-Fiume, G.** (2013).  $\alpha$ v $\beta$ 6- and  $\alpha$ v $\beta$ 8-integrins serve as interchangeable receptors for HSV gH/gL to promote endocytosis and activation of membrane fusion. *PLoS Pathog.* **9**, e1003806. doi:10.1371/journal.ppat.1003806
- Gianni, T., Massaro, R. and Campadelli-Fiume, G.** (2015). Dissociation of HSV gL from gH by  $\alpha$ v $\beta$ 6- or  $\alpha$ v $\beta$ 8-integrin promotes gH activation and virus entry. *Proc. Natl. Acad. Sci. USA* **112**, E3901-E3910. doi:10.1073/pnas.1506846112
- Ginsberg, M. H.** (2014). Integrin activation. *BMB Rep.* **47**, 655-659. doi:10.5483/BMBRep.2014.47.12.241
- Glinka, Y. and Prud'homme, G. J.** (2008). Neuropilin-1 is a receptor for transforming growth factor beta-1, activates its latent form, and promotes regulatory T cell activity. *J. Leukoc. Biol.* **84**, 302-310. doi:10.1189/jlb.0208090
- Graus-Porta, D., Blaess, S., Senften, M., Littlewood-Evans, A., Damsky, C., Huang, Z., Orban, P., Klein, R., Schittny, J. C. and Müller, U.** (2001).  $\beta$ 1-class integrins regulate the development of laminae and folia in the cerebral and cerebellar cortex. *Neuron* **31**, 367-379. doi:10.1016/S0896-6273(01)00374-9
- Gu, C., Rodriguez, E. R., Reimert, D. V., Shu, T., Fritzsche, B., Richards, L. J., Kolodkin, A. L. and Ginty, D. D.** (2003). Neuropilin-1 conveys semaphorin and VEGF signaling during neural and cardiovascular development. *Dev. Cell* **5**, 45-57. doi:10.1016/S1534-5807(03)00169-2
- Guasch, G., Schober, M., Pasolli, H. A., Conn, E. B., Polak, L. and Fuchs, E.** (2007). Loss of TGF $\beta$  signaling destabilizes homeostasis and promotes squamous cell carcinomas in stratified epithelia. *Cancer Cell* **12**, 313-327. doi:10.1016/j.ccr.2007.08.020
- Guerrero, P. A., Tchaicha, J. H., Chen, Z., Morales, J. E., McCarty, N., Wang, Q., Sulman, E. P., Fuller, G., Lang, F. F., Rao, G. et al.** (2017). Glioblastoma stem cells exploit the  $\alpha$ v $\beta$ 8 integrin-TGF $\beta$ 1 signaling axis to drive tumor initiation and progression. *Oncogene* **36**, 6568-6580. doi:10.1038/onc.2017.248
- Harburger, D. S., Bouaouina, M. and Calderwood, D. A.** (2009). Kindlin-1 and -2 directly bind the C-terminal region of  $\beta$  integrin cytoplasmic tails and exert integrin-specific activation effects. *J. Biol. Chem.* **284**, 11485-11497. doi:10.1074/jbc.M809233200
- Hinck, A. P., Mueller, T. D. and Springer, T. A.** (2016). Structural biology and evolution of the TGF- $\beta$  family. *Cold Spring Harb. Perspect Biol.* **8**, a022103. doi:10.1101/cshperspect.a022103
- Hirai, T., Zenke, Y., Yang, Y., Bartholin, L., Beura, L. K., Masopust, D. and Kaplan, D. H.** (2019). Keratinocyte-mediated activation of the cytokine TGF- $\beta$  maintains skin recirculating memory CD8<sup>+</sup> T cells. *Immunity* **50**, 1249-1261.e5. doi:10.1016/j.immuni.2019.03.002
- Hirota, S., Liu, Q., Lee, H. S., Hossain, M. G., Lacy-Hulbert, A. and McCarty, J. H.** (2011). The astrocyte-expressed integrin  $\alpha$ v $\beta$ 8 governs blood vessel sprouting in the developing retina. *Development* **138**, 5157-5166. doi:10.1242/dev.069153
- Hirota, S., Clements, T. P., Tang, L. K., Morales, J. E., Lee, H. S., Oh, S. P., Rivera, G. M., Wagner, D. S. and McCarty, J. H.** (2015). Neuropilin 1 balances  $\beta$ 8 integrin-activated TGF $\beta$  signaling to control sprouting angiogenesis in the brain. *Development* **142**, 4363-4373. doi:10.1242/dev.113746
- Hodivala-Dilke, K. M., McHugh, K. P., Tsakiris, D. A., Rayburn, H., Crowley, D., Ullman-Culleré, M., Ross, F. P., Collier, B. S., Teitelbaum, S. and Hynes, R. O.** (1999).  $\beta$ 3-integrin-deficient mice are a model for Glanzmann thrombasthenia showing placental defects and reduced survival. *J. Clin. Invest.* **103**, 229-238. doi:10.1172/JCI5487
- Hsu, A., Esmaili, B., Hayek, B., Hossain, M. G., Shinder, R., Lazar, A. J. and McCarty, J. H.** (2011). Analysis of  $\alpha$ v integrin protein expression in human eyelid and periorbital squamous cell carcinomas. *J. Cutan. Pathol.* **38**, 570-575. doi:10.1111/j.1600-0560.2011.01687.x
- Huang, X., Griffiths, M., Wu, J., Farese, R. V., Jr. and Sheppard, D.** (2000). Normal development, wound healing, and adenovirus susceptibility in  $\beta$ 5-deficient mice. *Mol. Cell Biol.* **20**, 755-759. doi:10.1128/MCB.20.3.755-759.2000
- Huang, L., Cai, J. L., Huang, P. Z., Kang, L., Huang, M. J., Wang, L. and Wang, J. P.** (2017). miR19b-3p promotes the growth and metastasis of colorectal cancer via directly targeting ITGB8. *Am. J. Cancer Res.* **7**, 1996-2008.
- Hutt-Fletcher, L. M. and Chesnokova, L. S.** (2010). Integrins as triggers of Epstein-Barr virus fusion and epithelial cell infection. *Virulence* **1**, 395-398. doi:10.4161/viru.1.5.12546
- Hynes, R. O.** (2002). Integrins: bidirectional, allosteric signaling machines. *Cell* **110**, 673-687. doi:10.1016/S0092-8674(02)00971-6
- Hynes, R. O., Lively, J. C., McCarty, J. H., Taverna, D., Francis, S. E., Hodivala-Dilke, K. and Xiao, Q.** (2002). The diverse roles of integrins and their ligands in angiogenesis. *Cold Spring Harb. Symp. Quant. Biol.* **67**, 143-153. doi:10.1101/sqb.2002.67.143
- Jackson, T., Clark, S., Berryman, S., Burman, A., Cambier, S., Mu, D., Nishimura, S. and King, A. M.** (2004). Integrin  $\alpha$ v $\beta$ 8 functions as a receptor for foot-and-mouth disease virus: role of the beta-chain cytodomain in integrin-mediated infection. *J. Virol.* **78**, 4533-4540. doi:10.1128/JVI.78.9.4533-4540.2004
- Jiao, S., Subudhi, S. K., Aparicio, A., Ge, Z., Guan, B., Miura, Y. and Sharma, P.** (2019). Differences in tumor microenvironment dictate T Helper lineage polarization and response to immune checkpoint therapy. *Cell* **179**, 1177-1190.e13. doi:10.1016/j.cell.2019.10.029
- Jin, S., Lee, W. C., Aust, D., Pilarsky, C. and Cordes, N.** (2019).  $\beta$ 8 integrin mediates pancreatic cancer cell radiochemoresistance. *Mol. Cancer Res.* **17**, 2126-2138. doi:10.1158/1541-7786.MCR-18-1352
- Kelly, A., Gunaltay, S., McEntee, C. P., Shuttleworth, E. E., Smedley, C., Houston, S. A., Fenton, T. M., Levison, S., Mann, E. R. and Travis, M. A.** (2018). Human monocytes and macrophages regulate immune tolerance via integrin  $\alpha$ v $\beta$ 8-mediated TGF $\beta$  activation. *J. Exp. Med.* **215**, 2725-2736. doi:10.1084/jem.20171491
- Khan, S., Lakhe-Reddy, S., McCarty, J. H., Sorenson, C. M., Sheibani, N., Reichardt, L. F., Kim, J. H., Wang, B., Sedor, J. R. and Schelling, J. R.** (2011). Mesangial cell integrin  $\alpha$ v $\beta$ 8 provides glomerular endothelial cell cytoprotection by sequestering TGF- $\beta$  and regulating PECAM-1. *Am. J. Pathol.* **178**, 609-620. doi:10.1016/j.ajpath.2010.10.031



- Kim, K. K., Sheppard, D. and Chapman, H. A. (2018). TGF- $\beta$ 1 signaling and tissue fibrosis. *Cold Spring Harb. Perspect. Biol.* **10**, a022293. doi:10.1101/cshperspect.a022293
- Kitamura, H., Cambier, S., Somanath, S., Barker, T., Minagawa, S., Markovics, J., Goodsell, A., Publicover, J., Reichardt, L., Jablons, D. et al. (2011). Mouse and human lung fibroblasts regulate dendritic cell trafficking, airway inflammation, and fibrosis through integrin  $\alpha$ v $\beta$ 8-mediated activation of TGF- $\beta$ . *J. Clin. Invest.* **121**, 2863-2875. doi:10.1172/JCI45589
- Kwiatkowski, S. C., Guerrero, P. A., Hirota, S., Chen, Z., Morales, J. E., Aghi, M. and McCarty, J. H. (2017). Neuropilin-1 modulates TGF $\beta$  signaling to drive glioblastoma growth and recurrence after anti-angiogenic therapy. *PLoS ONE* **12**, e0185065. doi:10.1371/journal.pone.0185065
- Lacy-Hulbert, A., Smith, A. M., Tissire, H., Barry, M., Crowley, D., Bronson, R. T., Roes, J. T., Savill, J. S. and Hynes, R. O. (2007). Ulcerative colitis and autoimmunity induced by loss of myeloid alphav integrins. *Proc. Natl. Acad. Sci. USA* **104**, 15823-15828. doi:10.1073/pnas.0707421104
- Lakhe-Reddy, S., Khan, S., Konieczkowski, M., Jarad, G., Wu, K. L., Reichardt, L. F., Takai, Y., Bruggeman, L. A., Wang, B., Sedor, J. R. et al. (2006).  $\beta$ 8 integrin binds Rho GDP dissociation inhibitor-1 and activates Rac1 to inhibit mesangial cell myofibroblast differentiation. *J. Biol. Chem.* **281**, 19688-19699. doi:10.1074/jbc.M601110200
- Lakhe-Reddy, S., Li, V., Arnold, T. D., Khan, S. and Schelling, J. R. (2014). Mesangial cell  $\alpha$ v $\beta$ 8-integrin regulates glomerular capillary integrity and repair. *Am. J. Physiol. Renal. Physiol.* **306**, F1400-F1409. doi:10.1152/ajprenal.00624.2013
- LaPointe, V. L., Verpoorte, A. and Stevens, M. M. (2013). The changing integrin expression and a role for integrin  $\beta$ 8 in the chondrogenic differentiation of mesenchymal stem cells. *PLoS ONE* **8**, e82035. doi:10.1371/journal.pone.0082035
- Lathia, J. D., Mack, S. C., Mulkearns-Hubert, E. E., Valentim, C. L. and Rich, J. N. (2015). Cancer stem cells in glioblastoma. *Genes Dev.* **29**, 1203-1217. doi:10.1101/gad.261982.115
- Lee, H. S., Cheerathodi, M., Chaki, S. P., Reyes, S. B., Zheng, Y., Lu, Z., Paidassi, H., DerMardirossian, C., Lacy-Hulbert, A., Rivera, G. M. et al. (2015). Protein tyrosine phosphatase-PEST and  $\beta$ 8 integrin regulate spatiotemporal patterns of RhoGDI1 activation in migrating cells. *Mol. Cell. Biol.* **35**, 1401-1413. doi:10.1128/MCB.00112-15
- Li, G., Yang, H., Han, K., Zhu, D., Lun, P. and Zhao, Y. (2018). A novel circular RNA, hsa\_circ\_0046701, promotes carcinogenesis by increasing the expression of miR-142-3p target ITGB8 in glioma. *Biochem. Biophys. Res. Commun.* **498**, 254-261. doi:10.1016/j.bbrc.2018.01.076
- Lienart, S., Merceron, R., Vanderaa, C., Lambert, F., Colau, D., Stockis, J., van der Woning, B., De Haard, H., Saunders, M., Coulie, P. G. et al. (2018). Structural basis of latent TGF- $\beta$ 1 presentation and activation by GARP on human regulatory T cells. *Science* **362**, 952-956. doi:10.1126/science.aau2909
- Liu, J., Zeng, L., Kennedy, R. M., Gruenig, N. M. and Childs, S. J. (2012).  $\beta$ Pix plays a dual role in cerebral vascular stability and angiogenesis, and interacts with integrin  $\alpha$ v $\beta$ 8. *Dev. Biol.* **363**, 95-105. doi:10.1016/j.ydbio.2011.12.022
- Ma, S. and Huang, Z. (2015). Neural regulation of CNS angiogenesis during development. *Front. Biol.* **10**, 61-73. doi:10.1007/s11515-014-1331-y
- Ma, S., Santhosh, D., Kumar, T. P. and Huang, Z. (2017). A brain-region-specific neural pathway regulating germinal matrix angiogenesis. *Dev. Cell* **41**, 366-381.e4. doi:10.1016/j.devcel.2017.04.014
- Mack, F., Baumert, B. G., Schäfer, N., Hattingen, E., Scheffler, B., Herrlinger, U. and Glas, M. (2016). Therapy of leptomeningeal metastasis in solid tumors. *Cancer Treat. Rev.* **43**, 83-91. doi:10.1016/j.ctrv.2015.12.004
- Malekpour Afshar, R., Mollaei, H. R., Shokrizadeh, M. and Iranpour, M. (2017). Evaluation expression of microrna-93 and integrin Beta8 in different types of glioma tumors. *Asian Pac. J. Cancer Prev.* **18**, 603-608.
- Malric, L., Monferran, S., Delmas, C., Arnauduc, F., Dahan, P., Boyrie, S., Deshors, P., Lubrano, V., Da Mota, D. F., Gilhodes, J. et al. (2019). Inhibiting integrin beta8 to differentiate and radiosensitize glioblastoma-initiating cells. *Mol. Cancer Res.* **17**, 384-397. doi:10.1158/1541-7786.MCR-18-0386
- Mani, V., Bromley, S. K., Aijo, T., Mora-Buch, R., Carrizosa, E., Warner, R. D., Hamze, M., Sen, D. R., Chasse, A. Y., Lorant, A. et al. (2019). Migratory DCs activate TGF- $\beta$  to precondition naive CD8<sup>+</sup> T cells for tissue-resident memory fate. *Science* **366**. doi:10.1126/science.aav5728
- Mao, L., Jin, H., Wang, M., Hu, Y., Chen, S., He, Q., Chang, J., Hong, C., Zhou, Y., Wang, D. et al. (2020). Neurologic manifestations of hospitalized patients with coronavirus disease 2019 in Wuhan, China. *JAMA Neurol.* Published online April 10, 2020. doi:10.1001/jamaneurol.2020.1127
- Markovics, J. A., Araya, J., Cambier, S., Jablons, D., Hill, A., Wolters, P. J. and Nishimura, S. L. (2010). Transcription of the transforming growth factor  $\beta$  activating integrin  $\beta$ 8 subunit is regulated by SP3, AP-1, and the p38 pathway. *J. Biol. Chem.* **285**, 24695-24706. doi:10.1074/jbc.M110.113977
- Markovics, J. A., Araya, J., Cambier, S., Somanath, S., Gline, S., Jablons, D., Hill, A., Wolters, P. J. and Nishimura, S. L. (2011). Interleukin-1 $\beta$  induces increased transcriptional activation of the transforming growth factor- $\beta$ -activating integrin subunit  $\beta$ 8 through altering chromatin architecture. *J. Biol. Chem.* **286**, 36864-36874. doi:10.1074/jbc.M111.276790
- Massague, J. (2008). TGF $\beta$  in cancer. *Cell* **134**, 215-230. doi:10.1016/j.cell.2008.07.001
- McCarty, J. H. (2008). Alphav integrins lead the way for colorectal metastases. *Clin. Cancer Res.* **14**, 6351-6353. doi:10.1158/1078-0432.CCR-08-1847
- McCarty, J. H. (2009). Cell adhesion and signaling networks in brain neurovascular units. *Curr. Opin. Hematol.* **16**, 209-214. doi:10.1097/MOH.0b013e32832a07eb
- McCarty, J. H., Monahan-Earley, R. A., Brown, L. F., Keller, M., Gerhardt, H., Rubin, K., Shani, M., Dvorak, H. F., Wolburg, H., Bader, B. L. et al. (2002). Defective associations between blood vessels and brain parenchyma lead to cerebral hemorrhage in mice lacking alphav integrins. *Mol. Cell. Biol.* **22**, 7667-7677. doi:10.1128/MCB.22.21.7667-7677.2002
- McCarty, J. H., Barry, M., Crowley, D., Bronson, R. T., Lacy-Hulbert, A. and Hynes, R. O. (2008). Genetic ablation of alphav integrins in epithelial cells of the eyelid skin and conjunctiva leads to squamous cell carcinoma. *Am. J. Pathol.* **172**, 1740-1747. doi:10.2353/ajpath.2008.070700
- McCarty, J. H., Cook, A. A. and Hynes, R. O. (2005a). An interaction between {alpha}v{beta}8 integrin and Band 4.1B via a highly conserved region of the Band 4.1 C-terminal domain. *Proc. Natl. Acad. Sci. USA* **102**, 13479-13483. doi:10.1073/pnas.0506068102
- McCarty, J. H., Lacy-Hulbert, A., Charest, A., Bronson, R. T., Crowley, D., Housman, D., Savill, J., Roes, J. and Hynes, R. O. (2005b). Selective ablation of alphav integrins in the central nervous system leads to cerebral hemorrhage, seizures, axonal degeneration and premature death. *Development* **132**, 165-176. doi:10.1242/dev.01551
- Melton, A. C., Bailey-Bucktrout, S. L., Travis, M. A., Fife, B. T., Bluestone, J. A. and Sheppard, D. (2010). Expression of  $\alpha$ v $\beta$ 8 integrin on dendritic cells regulates Th17 cell development and experimental autoimmune encephalomyelitis in mice. *J. Clin. Invest.* **120**, 4436-4444. doi:10.1172/JCI43786
- Milner, R., Huang, X., Wu, J., Nishimura, S., Pytela, R., Sheppard, D. and French-Constant, C. (1999). Distinct roles for astrocyte alphavbeta5 and alphavbeta8 integrins in adhesion and migration. *J. Cell Sci.* **112**, 4271-4279.
- Milner, R., Relvas, J. B., Fawcett, J. and French-Constant, C. (2001). Developmental regulation of alphav integrins produces functional changes in astrocyte behavior. *Mol. Cell. Neurosci.* **18**, 108-118. doi:10.1006/mcne.2001.1003
- Minagawa, S., Lou, J., Seed, R. I., Cormier, A., Wu, S., Cheng, Y., Murray, L., Tsui, P., Connor, J., Herbst, R. et al. (2014). Selective targeting of TGF-beta activation to treat fibroinflammatory airway disease. *Sci. Transl. Med.* **6**, a79. doi:10.1126/scitranslmed.3008074
- Mobley, A. K., Tchaicha, J. H., Shin, J., Hossain, M. G. and McCarty, J. H. (2009). Beta8 integrin regulates neurogenesis and neurovascular homeostasis in the adult brain. *J. Cell Sci.* **122**, 1842-1851. doi:10.1242/jcs.043257
- Mobley, A. K. and McCarty, J. H. (2011).  $\beta$ 8 integrin is essential for neuroblast migration in the rostral migratory stream. *Glia* **59**, 1579-1587. doi:10.1002/glia.21199
- Mohammed, J., Beura, L. K., Bobr, A., Astry, B., Chicoine, B., Kashem, S. W., Welty, N. E., Igyarto, B. Z., Wijeyesinghe, S., Thompson, E. A. et al. (2016). Stromal cells control the epithelial residence of DCs and memory T cells by regulated activation of TGF- $\beta$ . *Nat. Immunol.* **17**, 414-421. doi:10.1038/ni.3396
- Moissoglu, K. and Schwartz, M. A. (2006). Integrin signalling in directed cell migration. *Biol. Cell* **98**, 547-555. doi:10.1042/BC20060025
- Moyle, M., Napier, M. A. and McLean, J. W. (1991). Cloning and expression of a divergent integrin subunit beta 8. *J. Biol. Chem.* **266**, 19650-19658.
- Mu, D., Cambier, S., Fjellbirkeland, L., Baron, J. L., Munger, J. S., Kawakatsu, H., Sheppard, D., Broadbura, V. C. and Nishimura, S. L. (2002). The integrin  $\alpha$ v $\beta$ 8 mediates epithelial homeostasis through MT1-MMP-dependent activation of TGF- $\beta$ 1. *J. Cell Biol.* **157**, 493-507. doi:10.1083/jcb.200109100
- Munger, J. S., Huang, X., Kawakatsu, H., Griffiths, M. J., Dalton, S. L., Wu, J., Pitter, J. F., Kaminski, N., Garat, C., Matthey, M. A. et al. (1999). The integrin  $\alpha$ v $\beta$ 6 binds and activates latent TGF  $\beta$ 1: a mechanism for regulating pulmonary inflammation and fibrosis. *Cell* **96**, 319-328. doi:10.1016/S0092-8674(00)80545-0
- Murase, S. and Horwitz, A. F. (2004). Directions in cell migration along the rostral migratory stream: the pathway for migration in the brain. *Curr. Top. Dev. Biol.* **61**, 135-152. doi:10.1016/S0070-2153(04)61006-4
- Nguyen, H. L., Lee, Y. J., Shin, J., Lee, E., Park, S. O., McCarty, J. H. and Oh, S. P. (2011). TGF- $\beta$  signaling in endothelial cells, but not neuroepithelial cells, is essential for cerebral vascular development. *Lab. Invest.* **91**, 1554-1563. doi:10.1038/labinvest.2011.124
- Nishimura, S. L., Sheppard, D. and Pytela, R. (1994). Integrin alpha v beta 8. Interaction with vitronectin and functional divergence of the beta 8 cytoplasmic domain. *J. Biol. Chem.* **269**, 28708-28715.
- Ozawa, A., Sato, Y., Imabayashi, T., Uemura, T., Takagi, J. and Sekiguchi, K. (2016). Molecular basis of the ligand binding specificity of  $\alpha$ v $\beta$ 8 Integrin. *J. Biol. Chem.* **291**, 11551-11565. doi:10.1074/jbc.M116.719138
- Paredes, I., Himmels, P. and Ruiz de Almodovar, C. (2018). Neurovascular communication during CNS development. *Dev. Cell* **45**, 10-32. doi:10.1016/j.devcel.2018.01.023
- Park, S. O., Lee, Y. J., Seki, T., Hong, K. H., Fliess, N., Jiang, Z., Park, A., Wu, X., Kaartinen, V., Roman, B. L. et al. (2008). ALK5- and TGFBR2-independent role

- of ALK1 in the pathogenesis of hereditary hemorrhagic telangiectasia type 2. *Blood* **111**, 633-642. doi:10.1182/blood-2007-08-107359
- Penuelas, S., Anido, J., Prieto-Sanchez, R. M., Folch, G., Barba, I., Cuartas, I., Garcia-Dorado, D., Poca, M. A., Sahuquillo, J., Baselga, J. et al.** (2009). TGF- $\beta$  increases glioma-initiating cell self-renewal through the induction of LIF in human glioblastoma. *Cancer Cell* **15**, 315-327. doi:10.1016/j.ccr.2009.02.011
- Pollen, A. A., Bhaduri, A., Andrews, M. G., Nowakowski, T. J., Meyerson, O. S., Mostajo-Radji, M. A., Di Lullo, E., Alvarado, B., Bedolli, M., Dougherty, M. L. et al.** (2019). Establishing cerebral organoids as models of human-specific brain evolution. *Cell* **176**, 743-756.e17. doi:10.1016/j.cell.2019.01.017
- Proctor, J. M., Zang, K., Wang, D., Wang, R. and Reichardt, L. F.** (2005). Vascular development of the brain requires beta8 integrin expression in the neuroepithelium. *J. Neurosci.* **25**, 9940-9948. doi:10.1523/JNEUROSCI.3467-05.2005
- Qin, Y., Garrison, B. S., Ma, W., Wang, R., Jiang, A., Li, J., Mistry, M., Bronson, R. T., Santoro, D., Franco, C. et al.** (2018). A milieu molecule for TGF- $\beta$  required for microglia function in the nervous system. *Cell* **174**, 156-171.e16. doi:10.1016/j.cell.2018.05.027
- Reyes, S. B., Narayanan, A. S., Lee, H. S., Tchaicha, J. H., Aldape, K. D., Lang, F. F., Toliass, K. F. and McCarty, J. H.** (2013a).  $\alpha$ v $\beta$ 8 integrin interacts with RhoGDI1 to regulate Rac1 and Cdc42 activation and drive glioblastoma cell invasion. *Mol. Biol. Cell* **24**, 474-482. doi:10.1091/mbc.e12-07-0521
- Reyes, S. B., Narayanan, A. S., Lee, H. S., Tchaicha, J. H., Aldape, K. D., Lang, F. F., Toliass, K. F. and McCarty, J. H.** (2013b).  $\alpha$ v $\beta$ 8 integrin interacts with RhoGDI1 to regulate Rac1 and Cdc42 activation and drive glioblastoma cell invasion. *Mol. Biol. Cell* **24**, 474-482. doi:10.1091/mbc.e12-07-0521
- Sanai, N., Nguyen, T., Ihrie, R. A., Mirzadeh, Z., Tsai, H.-H., Wong, M., Gupta, N., Berger, M. S., Huang, E., Garcia-Verdugo, J.-M. et al.** (2011). Corridors of migrating neurons in the human brain and their decline during infancy. *Nature* **478**, 382-386. doi:10.1038/nature10487
- Santhosh, D. and Huang, Z.** (2015). Regulation of the nascent brain vascular network by neural progenitors. *Mech. Dev.* **138**, 37-42. doi:10.1016/j.mod.2015.06.005
- Santhosh, D., Sherman, J., Chowdhury, S. and Huang, Z.** (2019). Harnessing region-specific neurovascular signaling to promote germinal matrix vessel maturation and hemorrhage prevention. *Dis. Model. Mech.* **12**, dmm041228. doi:10.1242/dmm.041228
- Savar, A., Acin, S., Gonzalez, C. L., El-Sawy, T., Mejia, O., Li, Z., Esmaeli, B., Lacy-Hulbert, A., El-Naggar, A. K., McCarty, J. H. et al.** (2015). Loss of epithelial p53 and  $\alpha$ v integrin cooperate through Akt to induce squamous cell carcinoma yet prevent remodeling of the tumor microenvironment. *Oncogene* **34**, 516-524. doi:10.1038/onc.2013.585
- Schittenhelm, J., Klein, A., Tatagiba, M. S., Meyermann, R., Fend, F., Goodman, S. L. and Sipos, B.** (2013). Comparing the expression of integrins alphavbeta3, alphavbeta5, alphavbeta6, alphavbeta8, fibronectin and fibrinogen in human brain metastases and their corresponding primary tumors. *Int. J. Clin. Exp. Pathol.* **6**, 2719-2732.
- Shi, M., Zhu, J., Wang, R., Chen, X., Mi, L., Walz, T. and Springer, T. A.** (2011). Latent TGF- $\beta$  structure and activation. *Nature* **474**, 343-349. doi:10.1038/nature10152
- Sigrist, C. J., Bridge, A. and Le Mercier, P.** (2020). A potential role for integrins in host cell entry by SARS-CoV-2. *Antiviral Res.* **177**, 104759. doi:10.1016/j.antiviral.2020.104759
- Stockis, J., Lienart, S., Colau, D., Collignon, A., Nishimura, S. L., Sheppard, D., Coulie, P. G. and Lucas, S.** (2017). Blocking immunosuppression by human Tregs in vivo with antibodies targeting integrin  $\alpha$ v $\beta$ 8. *Proc. Natl. Acad. Sci. USA* **114**, E10161-E10168. doi:10.1073/pnas.1710680114
- Su, H., Kim, H., Pawlikowska, L., Kitamura, H., Shen, F., Cambier, S., Markovics, J., Lawton, M. T., Sidney, S., Bollen, A. W. et al.** (2010). Reduced expression of integrin alphavbeta8 is associated with brain arteriovenous malformation pathogenesis. *Am. J. Pathol.* **176**, 1018-1027. doi:10.2353/ajpath.2010.090453
- Takasaka, N., Seed, R. I., Cormier, A., Bondesson, A. J., Lou, J., Elattma, A., Ito, S., Yanagisawa, H., Hashimoto, M., Ma, R. et al.** (2018). Integrin alphavbeta8-expressing tumor cells evade host immunity by regulating TGF-beta activation in immune cells. *JCI Insight* **3**. doi:10.1172/jci.insight.122591
- Tata, M., Ruhrberg, C. and Fantin, A.** (2015). Vascularisation of the central nervous system. *Mech. Dev.* **138**, 26-36. doi:10.1016/j.mod.2015.07.001
- Tchaicha, J. H., Reyes, S. B., Shin, J., Hossain, M. G., Lang, F. F. and McCarty, J. H.** (2011). Glioblastoma angiogenesis and tumor cell invasiveness are differentially regulated by beta8 integrin. *Cancer Res.* **71**, 6371-6381. doi:10.1158/0008-5472.CAN-11-0991
- Tiwary, S., Morales, J. E., Kwiatkowski, S. C., Lang, F. F., Rao, G. and McCarty, J. H.** (2018). Metastatic brain tumors disrupt the blood-brain barrier and alter lipid metabolism by inhibiting expression of the endothelial cell fatty acid transporter Mfsd2a. *Sci. Rep.* **8**, 8267. doi:10.1038/s41598-018-26636-6
- Travis, M. A., Reizis, B., Melton, A. C., Masteller, E., Tang, Q., Proctor, J. M., Wang, Y., Bernstein, X., Huang, X., Reichardt, L. F. et al.** (2007). Loss of integrin  $\alpha$ v $\beta$ 8 on dendritic cells causes autoimmunity and colitis in mice. *Nature* **449**, 361-365. doi:10.1038/nature06110
- Venstrom, K. and Reichardt, L.** (1995). Beta 8 integrins mediate interactions of chick sensory neurons with laminin-1, collagen IV, and fibronectin. *Mol. Biol. Cell* **6**, 419-431. doi:10.1091/mbc.6.4.419
- Wang, J., Dong, X., Zhao, B., Li, J., Lu, C. and Springer, T. A.** (2017). Atypical interactions of integrin  $\alpha$ v $\beta$ 8 with pro-TGF- $\beta$ 1. *Proc. Natl. Acad. Sci. USA* **114**, E4168-E4174. doi:10.1073/pnas.1705129114
- Wang, J., Su, Y., Iacob, R. E., Engen, J. R. and Springer, T. A.** (2019). General structural features that regulate integrin affinity revealed by atypical  $\alpha$ v $\beta$ 8. *Nat. Commun.* **10**, 5481. doi:10.1038/s41467-019-13248-5
- Weis, S. M. and Cheresesh, D. A.** (2011). alphaV integrins in angiogenesis and cancer. *Cold Spring Harb. Perspect. Med.* **1**, a006478. doi:10.1101/cshperspect.a006478
- Weller, M., Nabors, L. B., Gorlia, T., Leske, H., Rushing, E., Bady, P., Hicking, C., Perry, J., Hong, Y. K., Roth, P. et al.** (2016). Cilengitide in newly diagnosed glioblastoma: biomarker expression and outcome. *Oncotarget* **7**, 15018-15032. doi:10.18632/oncotarget.7588
- Whitman, M. C., Fan, W., Rela, L., Rodriguez-Gil, D. J. and Greer, C. A.** (2009). Blood vessels form a migratory scaffold in the rostral migratory stream. *J. Comp. Neurol.* **516**, 94-104. doi:10.1002/cne.22093
- Worthington, J. J., Klementowicz, J. E. and Travis, M. A.** (2011). TGF $\beta$ : a sleeping giant awoken by integrins. *Trends Biochem. Sci.* **36**, 47-54. doi:10.1016/j.tibs.2010.08.002
- Worthington, J. J., Kelly, A., Smedley, C., Bauche, D., Campbell, S., Marie, J. C. and Travis, M. A.** (2015). Integrin  $\alpha$ v $\beta$ 8-mediated TGF- $\beta$  activation by effector regulatory T cells is essential for suppression of T-cell-mediated inflammation. *Immunity* **42**, 903-915. doi:10.1016/j.immuni.2015.04.012
- Wu, Y., Moissoglu, K., Wang, H., Wang, X., Frierson, H. F., Schwartz, M. A. and Theodorescu, D.** (2009). Src phosphorylation of RhoGDI2 regulates its metastasis suppressor function. *Proc. Natl. Acad. Sci. USA* **106**, 5807-5812. doi:10.1073/pnas.0810094106
- Yamazaki, S., Ema, H., Karlsson, G., Yamaguchi, T., Miyoshi, H., Shioda, S., Taketo, M. M., Karlsson, S., Iwama, A. and Nakauchi, H.** (2011). Nonmyelinating Schwann cells maintain hematopoietic stem cell hibernation in the bone marrow niche. *Cell* **147**, 1146-1158. doi:10.1016/j.cell.2011.09.053
- Yang, Z., Mu, Z., Dabovic, B., Jurukovski, V., Yu, D., Sung, J., Xiong, X. and Munger, J. S.** (2007). Absence of integrin-mediated TGF $\beta$ 1 activation in vivo recapitulates the phenotype of TGF $\beta$ 1-null mice. *J. Cell Biol.* **176**, 787-793. doi:10.1083/jcb.200611044
- Zhang, X., Jiang, G., Cai, Y., Monkley, S. J., Critchley, D. R. and Sheetz, M. P.** (2008). Talin depletion reveals independence of initial cell spreading from integrin activation and traction. *Nat. Cell Biol.* **10**, 1062-1068. doi:10.1038/ncb1765
- Zheng, Y. and Lu, Z.** (2013). Regulation of tumor cell migration by protein tyrosine phosphatase (PTP)-proline-, glutamate-, serine-, and threonine-rich sequence (PEST). *Chin J. Cancer* **32**, 75-83. doi:10.5732/cjc.012.10084
- Zhu, J., Motejlek, K., Wang, D., Zang, K., Schmidt, A. and Reichardt, L. F.** (2002). beta8 integrins are required for vascular morphogenesis in mouse embryos. *Development* **129**, 2891-2903.
